# Supplementary material for: Assessment of healthcare delivery in the early management of bacterial meningitis in UK young infants: an observational study
Source: PubMed Central journal article supplement — BMJ Open. 2017 Aug 21;7(8):e015700. doi: 10.1136/bmjopen-2016-015700 (PMC5724087; doi:10.1136/bmjopen-2016-015700), 2017-08-21
Supplement: bmjopen-2016-015700supp001.pdf [file bmjopen-2016-015700supp001.pdf]

SUPPLEMENTARY TABLE

| Parameter                  | All cases        |               |              | Home (n=66)             |                      |              | In-patient (n=31)       |                      |             |
|----------------------------|------------------|---------------|--------------|-------------------------|----------------------|--------------|-------------------------|----------------------|-------------|
|                            | No complications | Complications | P-value      | No complications (n=40) | Complications (n=26) | P-value      | No complications (n=17) | Complications (n=14) | P value     |
| Median age at presentation | 14 (3-31)        | 12 (3-23)     | 0.4          | 19 (13-37)              | 16 (9-25)            | 0.3          | 1 (0-3)                 | 2 (1-8)              | 0.3         |
| Early onset                | 16/57 (28)       | 14/40 (35)    | 0.5          | 3/40 (8)                | 5/26 (19)            | 0.2          | 13/17 (76)              | 9/14 (64)            | 0.7         |
| Male                       | 29 (51)          | 23/ 40 (58)   | 0.5          | 20/40 (50)              | 14/26 (54)           | 0.8          | 9/17 (53)               | 9/14 (64)            | 0.7         |
| Prematurity                | 11/57 (19)       | 12/40 (30)    | 0.2          | 4/40 (10)               | 4/26 (15)            | 0.7          | 7/17 (41)               | 8/14 (57)            | 0.4         |
| Median maternal age        | 30 (26-35)       | 29 (24-32)    | 0.2          | 29 (26-34)              | 29 (24-32)           | 0.8          | 31(27-40)               | 27(23-33)            | <b>0.07</b> |
| OOH presentation           | 31/57 (54)       | 16/40 (40)    | 0.2          | 21/40 (53)              | 9/26 (35)            | 0.2          | 10/17 (59)              | 7/14 (50)            | 0.6         |
| Inappropriate advice       | NA               | NA            | NA           | 16/40 (40)              | 14/26 (54)           | 0.3          | NA                      | NA                   | NA          |
| Fever or seizure           | 39/57 (68)       | 32/40 (80)    | 0.2          | 30/40 (75)              | 24/26 (92)           | 0.1          | 9/17 (53)               | 8/14 (57)            | 0.8         |
| Fever                      | 30/ 57 (53)      | 18/40 (45)    | 0.5          | 25/40 (63)              | 15/26 (58)           | 0.7          | 5/17 (29)               | 3/14 (21)            | 0.7         |
| Seizure                    | 13/57 (23)       | 20/ 40 (50)   | <b>0.005</b> | 7/40 (18)               | 14/26 (54)           | <b>0.002</b> | 6/17 (35)               | 6/14 (43)            | 0.7         |
| Fluid bolus                | 30/57 (53)       | 24/40 (60)    | 0.5          | 22/40 (55)              | 15/26 (58)           | 0.8          | 8/17 (47)               | 9/14 (64)            | 0.5         |
| Bacteria in CSF            | 41/57 (72)       | 23/40 (58)    | 0.1          | 31/40 (78)              | 17/26 (65)           | 0.3          | 10/17 (59)              | 6/14 (43)            | 0.6         |
| Non-conformity antibiotics | 31/57 (54)       | 21/40 (53)    | 0.9          | 21/40 (53)              | 14/26 (54)           | 0.8          | 10/17 (59)              | 7/14 (50)            | 0.6         |
| Antibiotics delay >6h      | 7/57 (12)        | 5/40 (13)     | 0.8          | 2/40 (5)                | 2/26 (8)             | 0.6          | 5/17 (29)               | 3/14 (21)            | 1.0         |
| Onset to help ≥12h         | NA               | NA            | NA           | 7/40 (18)               | 10/26(38)            | <b>0.06</b>  | NA                      | NA                   | NA          |

Supplementary Table 1: Univariate analysis of death (1 case) and serious complications. OOH= out of hours, h=hours, CSF= cerebrospinal fluid

| Pathogen                              | HOME                                                                                                                                                                                                                                                | IN-PATIENT                                                                                                                                                              |
|---------------------------------------|-----------------------------------------------------------------------------------------------------------------------------------------------------------------------------------------------------------------------------------------------------|-------------------------------------------------------------------------------------------------------------------------------------------------------------------------|
| GBS :<br>Home (24)<br>in-patient (10) | Cefotaxime/ ceftriaxone alone 9<br>Benzyl penicillin and gentamicin 7<br>Amoxicillin and gentamicin 3<br>Cefuroxime and metronidazole 1<br>Cefotaxime and flucloxacillin 1<br>Cefotaxime and gentamicin 1<br>Benzyl penicillin 1 and Co-amoxiclav 1 | Cefotaxime/ ceftriaxone alone 4<br>Benzyl penicillin and gentamicin 2<br>flucloxacillin and gentamicin 2<br>Amoxicillin and gentamicin 1<br>Vancomycin and gentamicin 1 |
| E. coli (5)                           | Benzyl penicillin and gentamicin 4<br>Benzyl penicillin and cefotaxime 1                                                                                                                                                                            | Cefotaxime/ ceftriaxone 1<br>Tazocin and Vancomycin 1                                                                                                                   |
| N. meningitidis (3)                   | Cefotaxime/ ceftriaxone 3                                                                                                                                                                                                                           |                                                                                                                                                                         |
| L. monocytogenes (2)                  | Cefotaxime 1                                                                                                                                                                                                                                        | Cefotaxime 1                                                                                                                                                            |
| Pasteurella spp (1)                   | Benzyl penicillin and gentamicin 1                                                                                                                                                                                                                  |                                                                                                                                                                         |
| Salmonella agama (1)                  | Flucloxacillin and gentamicin 1                                                                                                                                                                                                                     |                                                                                                                                                                         |
| <i>Klebsiella spp.</i> (1)            |                                                                                                                                                                                                                                                     | Teicoplanin 1                                                                                                                                                           |
| <i>S. bovis</i> (1)                   |                                                                                                                                                                                                                                                     | Cefotaxime 1                                                                                                                                                            |
| <i>H. influenzae</i> (1)              |                                                                                                                                                                                                                                                     | Cefotaxime and gentamicin 1                                                                                                                                             |

Supplementary Table 2: Isolated bacteria in cases where empiric antibiotics was not in conformity with existing guidelines and antibiotics started empirically
